# Supplementary material for: Consensus-based Detection of Aetiologic Copy Number Variants For Syndromic Orofacial Clefts Utilising Whole Exome Sequencing of Case Parent Trios
Source: Research Square preprint supplement (doi:10.21203/rs.3.rs-9225341/v1), 2026-04-01
Supplement: Supplementary file 2 [file 495bbcaf8d1edec74a007142.docx]

**Table S2: Other genes in the *de novo* CNV regions of Table 1**

| Patient ID | Chr | Start | End | CNV Size (bp) | Top Gene | Other Genes in Region |
| --- | --- | --- | --- | --- | --- | --- |
| GH20140599.1 | 12 | 153887435 | 159145021 | 5257586 | *SHH* | *DPP6; LOC101929998; LOC105375582; LOC105375581;*  *LOC105375580; PAXIP1-AS2; PAXIP1; LOC124901781; PAXIP1-DT; HTR5A-AS1; HTR5A;*  *LOC105375584; LOC124901782;*  *LOC124901783; LOC124901786;*  *LOC124901784; LOC124901785;*  *LOC124901787; LOC105375587; LOC105375588; LOC105375589; INSIG1-DT; INSIG1; LOC105375592; BLACE; LOC105375593; LINC03010;*  *LOC105375594; EN2-DT; EN2; CNPY1; RBM33-DT; RBM33; SHH; LOC124901788; LOC389602; LOC105375597; LOC124901789;*  *LOC105375603; LOC105375602;*  *LOC105375601; LOC124901790;*  *LOC124901791; LOC105375599; LOC285889; LOC124901792; RNF32-DT; LOC112268012; LINC00244; RNF32; RNF32-AS1; LMBR1; LOC102723795; LOC105375604; LOC105375605; NOM1; MNX1; MNX1-AS2; MNX1-AS1; LOC105375607; UBE3C; LOC124901803; DNAJB6; LOC101927914; LOC105375610; PTPRN2; MIR153-2; OC105375615; LOC105375614; PTPRN2-AS1; LOC105375613; MIR595; LOC124901793; LINC01022;*  *MIR5707; NCAPG2; ESYT2; DYNC2I1; LOC124901796;*  *LOC124901794; LOC124901795; LINC00689; VIPR2* |
| GH20207072.1 | 12 | 14695982 | 14843363 | 147381 | *WBP11* | *GUCY2C; GUCY2C-AS1; LOC105369669; H4C16; H2AJ;*  *C12orf60; SMCO3; ART4* |
| GH20228117.1 | 5 | 179344941 | 179345578 | 637 | *ADAMTS2* | None |
| GH20130815.1 | 12 | 63779711 | 63809342 | 29631 | *RXYLT1* | *RXYLT1-AS1* |
| GH20135043.1 | 15 | 33863889 | 33864439 | 550 | *RYR3* | *AVEN* |
| GH20160169.1 | 5 | 42628789 | 42629353 | 564 | *GHR* | None |
| GH20172509.1 | 22 | 20709046 | 20713039 | 3993 | *PI4KA* | None |
| GH20218033.1 | 11 | 120802444 | 121629813 | 827369 | *SC5D* | *GRIK4; LOC105369532; LOC101929227; LOC101929208;*  *TBCEL; TBCEL-TECTA; TECTA;*  *LOC105369533; LOC105369534; SORL1-AS1; SORL1; OC105369535* |
| GH20218033.1 | 17 | 7512973 | 7514429 | 1456 | *POLR2A* | None |
| GH20218075.1 | 22 | 20711100 | 20713039 | 1939 | *PI4KA* | None |
