# Supplementary material for: Consensus-based Detection of Aetiologic Copy Number Variants For Syndromic Orofacial Clefts Utilising Whole Exome Sequencing of Case Parent Trios
Source: Research Square preprint supplement (doi:10.21203/rs.3.rs-9225341/v1), 2026-04-01
Supplement: Supplementary file 3 [file 4b8c81a713a05858e7bc9310.docx]

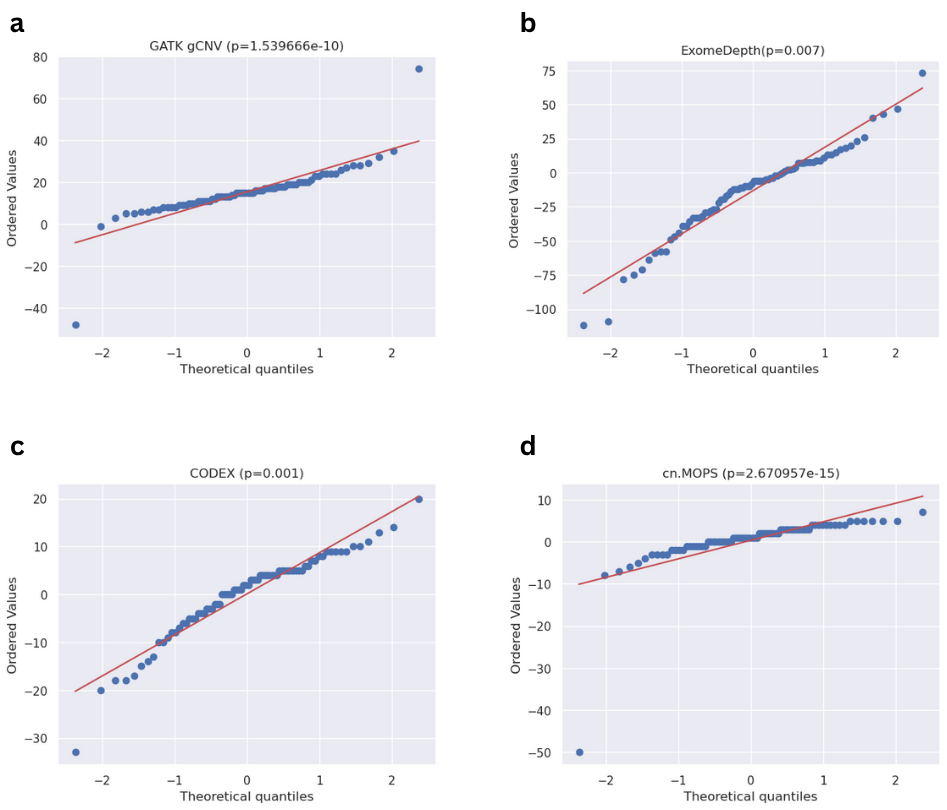


**Figure S1: Normality tests using Q-Q plots for each of the four tools:** **(a)** GATK gCNV, **(b)** ExomeDepth, **(c)** CODEX and **(d)** cn.MOPS. The p-value beside each tool’s name was calculated using shapiro-wilk test to confirm normality for the paired data (duplications and deletions) for each tool.
