# Supplementary material for: Consensus-based Detection of Aetiologic Copy Number Variants For Syndromic Orofacial Clefts Utilising Whole Exome Sequencing of Case Parent Trios
Source: Research Square preprint supplement (doi:10.21203/rs.3.rs-9225341/v1), 2026-04-01
Supplement: Supplementary file 4 [file 77f129bc2543cd6f6533b0ac.docx]

| Proband ID | Sex | Cleft Type | Suspected Syndrome Diagnosis | Other Phenotypic malformations |
| --- | --- | --- | --- | --- |
| GH20160169.1 | M | CP | Pierre Robin Sequence | Micrognathia, Glossoptosis |
| GH20160199.1 | F | CLP | Ectrodactyly, Ectodermal Dysplasia | Bilateral incomplete CLP: Right complete CLP plus Left complete CP plus bifid uvula; Ectrodactyly of right  hand: middle finger missing/rudimentary but other 4 fingers present; Little finger of right hand is stiff and cannot be bent; Thumb, index and ring fingers of right  hand folded on each other |
| GH20130774.1 | F | CP | Pierre Robin Sequence | Distally positioned tongue (glossoptosis); Small mandibles (micrognathia); Small external ears |
| GH20130796.1 | M | CP | OPITZ | Ulnar (postaxial) hexadactyly of both hands; Mild intellectual disability;  Speech delay until age 4; Mild microcephaly; Characteristic facial features: almost V-shaped head  with undulating surface; Cephalhaematoma |
| GH20130799.1 | F | CP | Goldenhar Syndrome | Extremely small or rudimentary  right (outer) ear; Mild micrognathia;  U-shaped cleft palate |
| GH20130815.1 | F | CP | Pierre Robin Sequence | Mild micrognathia; U-shaped cleft palate |
| GH20130857.1 | M | CL | Goldenhar Syndrome | Right unilateral anophthalmia; Incomplete development of right ear:  extremely small and malformed right ear; Right complete CL |
| GH20134915.1 | F | CP | Goldenhar Syndrome | Very large lateral CP; Left unilateral  Macrostomia; Low-set left ear; Bilateral talipes equinovarus (club feet); Hypoplasia of left face: rudimentary left cheekbone, i.e.  Left cheekbone is not palpable  and maxilla consists mainly of muscles; Bilateral eye discharge when chewing hard food; Asymmetry of  face and chin to the left; Stunted growth: looks lean and malnourished; Learning difficulties or disabilities;  still at nursery one though she is 11 years; Small face; Slender limbs; legs have no palpable calfs; Down-  slanting eyelids that make the eyes appear smaller; Congenital absence of left greater palatine artery |
| GH20134969.1 | F | CP | Pierre Robin Sequence | Severe micrognathia; Severe glossoptosis; Severe difficulty in breathing due to upper airway obstruction; Low-set ears. |
| GH20135043.1 | F | CP | Pierre Robin Sequence | Micrognathia; Glossoptosis; Mild hearing impairment; Eye problem: eyes turn red often with itchy feelings and thick yellowish secretions. |
| GH20140570.1 | M | CL | Kabuki Syndrome | Complete Bilateral CL; Arched  Eyebrows with lateral are, i.e. long eyelids; Down-slanting eyes and  palpebral fissures; Hypertelorism; Heart defect: soft systolic murmur heard at pulmonary region; Short stature; Mild intellectual disability; Large, prominent earlobes; Broad and  depressed nasal tip; Hepatomegaly; Tipped spleen |
| GH20140599.1 | M | CL | Holoprosencephaly | Left unilateral talipes equinovarus; Microcephaly; global developmental delay (No neck control at 8  Months); Heart defect - heart murmur;  Large, low-set ears; Left Complete  CL, alobar holoprosencephaly |
| GH20140607.1 | M | CLP | Goldenhar Syndrome | Right ear lobe completely absent or rudimentary; Left ear lobe very malformed and small; Micrognathia;  Mild glossoptosis; Right CLP |
| GH20140628.1 | M | CP | Pierre Robin Sequence | Severe micrognathia; Severe glossoptosis; Extremely underweight; weighs 3.6kg and has retroviral infection at stage 4 |
| GH20172509.1 | M | CP | Treacher Collins Syndrome | Large, low-set ears; Micrognathia;  Glossoptosis; Drooling; Not talking at  age 3; Down slanting eyes; Smooth philtrum; Flat midface/small cheekbones; Microcephaly; Low nasal  bridge; Small eye openings; Short nose; Characteristic/distinctive  facial appearance of TCS; Respiratory difficulty/abnormal airway |
| GH20207012.1 | M | CLP | Unknown | Midline complete CLP; Flat nasal bridge; Premaxilla missing |
| GH20207031.1 | F | CP | Freeman Sheldon Syndrome/distal arthrogryposis type 2A(DA2A) | Bilateral clubfoot; Camptodactyly; A characteristic face that causes her to appear to be whistling; Microstomia: small puckered mouth; Pursed lip; scar-like mark in the shape of ’H’, extending from the lower lip towards the bottom of the chin; Widely-spaced deep eyes; Prominent cheeks; Struggles to open the mouth; Diminished ability to suck; Flat  philtrum; High-arched, V-shaped and cleft palate |
| GH20207072.1 | F | CLP | Pierre Robin Sequence | Parietal encephalocele; Micrognathia; Microphthalmia (Left); Malformed right ear; Respiratory distress syndrome |
| GH20218033.1 | M | CP | Unknown | Ankyloglosia |
| GH20218034.1 | M | CLP | Unknown | Left complete CLP; Ankyloglossia |
| GH20218061.1 | F | CLP | Unknown | Right complete CLP; Missing right ear; Ankyloglossia |
| GH20218075.1 | M | CP | Pierre Robin Sequence | V-shaped high arched palate; Glossoptosis; Micrognathia |
| GH20218082.1 | M | CLP | Unknown | Right complete CLP; Right clubfoot; Syndactyly of the 3 middle left to toes; Malformation of both fingers |
| GH20228117.1 | M | CLP | Unknown | Right complete CLP; Hexadactyly (an extra thumb on right hand) |
| GH20228145.1 | F | CLP | Unknown | Ectrodactyly; Ectodermal  dysplasia |
| GH20238200.1 | F | Facial Cleft | Unknown | Tessier number 30; Cleft of lower lip and mandible; Bifid tongue; A cleft of soft tissue extends from the mandible  to the jugular notch of the sternum; Low set ears |

The table shows the syndromes and other observed phenotypes of the probands. The suspected syndrome diagnosis was based on the clinical presentation at the time of proband recruitment; no genetic test was available at that time. F represents Female, M represents Male, CP - Cleft Palate, CL - Cleft Lip, CLP - Cleft Lip and Palate.
