# Supplementary material for: Consensus-based Detection of Aetiologic Copy Number Variants For Syndromic Orofacial Clefts Utilising Whole Exome Sequencing of Case Parent Trios
Source: Research Square preprint supplement (doi:10.21203/rs.3.rs-9225341/v1), 2026-04-01
Supplement: Supplementary file 5 [file cfeb5fa9365393f865c464c0.docx]

| Patient ID | Chr | Start | End | CNV Size (bp) | CNV Type | De Novo | ACMG Class | Top Gene | Exomiser score |
| --- | --- | --- | --- | --- | --- | --- | --- | --- | --- |
| GH20130774.1 | 5 | 6599677 | 6600482 | 805 | DEL | No (Father) | 5 | *NSUN2* | 0.6302 |
| GH20130774.1 | 2 | 178431847 | 178451280 | 19433 | DUP | No (Both Parents) | 3 | *PRKRA* | 0.7084 |
| GH20130796.1 | 7 | 69599405 | 69600212 | 807 | DUP | No (Father) | 3 | *AUTS2* | 0.546 |
| GH20134915.1 | 5 | 13791744 | 14184209 | 392465 | DEL | No (Father) | 5 | *TRIO* | 0.6493 |
| GH20134915.1 | 1 | 1480617 | 1516338 | 35721 | DEL | No (Mother) | 5 | *ATAD3A* | 0.506 |
| GH20207072.1 | 1 | 155611910 | 155613329 | 1419 | DEL | No (Father) | 5 | *MSTO1* | 0.6556 |
| GH20130799.1 | 2 | 178431847 | 178451280 | 19433 | DUP | No (Both Parents) | 3 | *PRKRA* | 0.8491 |
| GH20130799.1 | 2 | 110115438 | 110213021 | 97583 | DUP | No (Father) | 3 | *NPHP1* | 0.5665 |
| GH20130799.1 | 16 | 75528899 | 75542933 | 14034 | DUP | No (Father) | 3 | *TMEM231* | 0.5915 |
| GH20135043.1 | 17 | 36195037 | 36557586 | 362549 | DUP | No (Mother) | 3 | *PIGW* | 0.5286 |
| GH20140570.1 | 1 | 16022370 | 16033908 | 11538 | DUP | No (Father) | 3 | *CLCNKA* | 0.5757 |
| GH20140570.1 | 6 | 32578842 | 32589992 | 11150 | DUP | No (Mother) | 3 | *HLA-DRB1* | 0.5757 |
| GH20140599.1 | 4 | 1236853 | 1237680 | 827 | DUP | No (Mother) | 3 | *CTBP1* | 0.6367 |
| GH20140607.1 | 15 | 41572193 | 41578526 | 6333 | DUP | No (Mother) | 3 | *TYRO3* | 0.5098 |
| GH20140628.1 | 7 | 16215817 | 16308877 | 93060 | DUP | No (Father) | 3 | *CRPPA* | 0.5981 |
| GH20140628.1 | 7 | 15685637 | 15686652 | 1015 | DUP | No (Father) | 3 | *MEOX2* | 0.7996 |
| GH20160169.1 | 22 | 20709046 | 20713039 | 3993 | DUP | No (Father) | 3 | *PI4KA* | 0.7894 |
| GH20172509.1 | 16 | 89814270 | 89818788 | 4518 | DUP | No (Father) | 3 | *FANCA* (HI=30) | 0.5564 |
| GH20207031.1 | 2 | 178431847 | 178451280 | 19433 | DUP | No (Mother) | 3 | *PRKRA* | 0.5115 |
| GH20228145.1 | 16 | 75528899 | 75542933 | 14034 | DUP | No (Father) | 3 | *TMEM231* | 0.6035 |

Individuals with inherited copy number variants with Exomiser scores consistent with the patient’s phenotype (score > 0.5) or highly specific to the phenotype (score > 0.7). A haploinsufficiency (HI) score of 30 indicates an association with an autosomal recessive phenotyp
