# Supplementary material for: Consensus-based Detection of Aetiologic Copy Number Variants For Syndromic Orofacial Clefts Utilising Whole Exome Sequencing of Case Parent Trios
Source: Research Square preprint supplement (doi:10.21203/rs.3.rs-9225341/v1), 2026-04-01
Supplement: Supplementary file 6 [file e094093adecf6c7e5fa40bf4.docx]

| **Term Name** | **Term ID** | **Adjusted p-value** | **Genes** |
| --- | --- | --- | --- |
| animal organ development | GO:0048513 | 1.29 x 10-2 | *HYDIN, FLI1, NSUN2, PRKRA, NPHP1, TMEM231, DNAH5, GGNBP2, INSIG1, EN2, SHH, NOM1, MNX1,* *DNAJB6, DYNC2I1, TYRO3, MEOX2, GHR, FANCA, FANCD2, H2AJ, TBCEL-TECTA, SORL1, POU2F3, ADAMTS2, ARHGAP32, DGCR6* |
| developmental process | GO:0032502 | 3.31 x 10-2 | *HYDIN, ETS1, FLI1,* *NSUN2, PRKRA, AUTS2, NPHP1, MTLN, MALL, TMEM231, TRIO, DNAH5, DHTKD1, MYO19, GGNBP2, HLA-DRB1, INSIG1, EN2, SHH, LMBR1, NOM1, MNX1, DNAJB6, NCAPG2, DYNC2I1, CTBP1, TYRO3, CRPPA, MEOX2, GHR, FANCA, FANCD2, H4C16, H2AJ, TBCEL-TECTA, SORL1, SMC5, POU2F3, ADAMTS2, ARHGAP32, RIMBP3, DGCR6* |
| anatomical structure  development | GO:0048856 | 2.39 x 10-2 | *HYDIN, ETS1, FLI1, NSUN2, PRKRA, AUTS2, NPHP1, MTLN, MALL, TMEM231, TRIO, DNAH5, DHTKD1, MYO19, GGNBP2, HLA-DRB1, INSIG1, EN2, SHH, LMBR1, NOM1, MNX1, DNAJB6, NCAPG2, DYNC2I1, TYRO3, CRPPA, MEOX2, GHR, FANCA, FANCD2, H4C16, H2AJ, TBCEL-TECTA, SORL1, POU2F3, ADAMTS2, ARHGAP32, RIMBP3, DGCR6* |
| 17q12 copy number variation syndrome | WP:WP5287 | 1.11 x 10-5 | *PIGW, CCL3L3, CCL4L2, TBC1D3I, TBC1D3H, ZNHIT3, MYO19, GGNBP2* |
| Aplasia of the 1st metacarpal | HP:0010035 | 5.28 x 10-4 | *TRIO, SHH, LMBR1, FANCD2* |
| Partial absence of thumb | HP:0009659 | 9.44 x 10-4 | *TRIO, SHH, LMBR1, FANCD2* |
| Aplasia of the proximal phalanges of the hand | HP:0010242 | 9.44 x 10-4 | *TRIO, SHH, LMBR1, FANCD2* |
| Abnormal mandible  morphology | HP:0000277 | 2.54 x 10-3 | *NSUN2, AUTS2, NPHP1, TMEM231, ATAD3A, TRIO, HBA2, PIGW, ZNHIT3, RYR3, NCAPG2, DYNC2I1, CTBP1, CRPPA, GHR, PI4KA, FANCA, FANCD2, WBP11, MSTO1, SC5D, SMC5, ADAMTS2, KCNJ5, DGCR6* |
| Abnormal facial skeleton morphology | HP:0011821 | 2.55 x 10-3 | *HYDIN, NSUN2, AUTS2, NPHP1, TMEM231, ATAD3A, TRIO, DNAH5, HBA2, PIGW, ZNHIT3, RYR3, SHH, NCAPG2, DYNC2I1, CTBP1, CRPPA, GHR, PI4KA, FANCA, FANCD2, WBP11, MSTO1, SC5D, SMC5, ADAMTS2, KCNJ5, DGCR6* |
| Hydrocephalus | HP:0000238 | 3.21 x 10-3 | *HYDIN, NSUN2, NPHP1, TMEM231, RXYLT1, DNAH5, HBA2, ZNHIT3, SHH, LMBR1, MNX1, CTBP1, CRPPA, FANCA, FANCD2* |
| Abnormal nasal morphology | HP:0005105 | 3.47 x 10-3 | *HYDIN, FLI1, NSUN2, AUTS2, NPHP1, TMEM231, ATAD3A, TRIO, DNAH5, HBA2,* *PIGW, ZNHIT3, RYR3, HLA-DRB1, SHH, LMBR1, NCAPG2, DYNC2I1, CTBP1, GHR, PI4KA, FANCA, FANCD2, WBP11, SC5D, SMC5, ADAMTS2, KCNJ5, DGCR6* |
| Aplasia of metacarpal bones | HP:0010048 | 3.64 x 10-3 | *TRIO, SHH, LMBR1, FANCD2* |
| Abnormal calvaria morphology | HP:0002683 | 3.92 x 10-3 | *FLI1, NSUN2, AUTS2, NPHP1, TMEM231, ATAD3A, TRIO, HBA2, PIGW, ZNHIT3, NCAPG2, DYNC2I1, CTBP1, CRPPA, PI4KA, FANCA, FANCD2, WBP11, POLR2A, SC5D, SMC5, KCNJ1, KCNJ5* |
| Abnormal jaw morphology | HP:0030791 | 6.5 x 10-3 | *NSUN2, AUTS2, NPHP1, TMEM231, ATAD3A, TRIO, HBA2, PIGW, ZNHIT3, RYR3, NCAPG2, DYNC2I1, CTBP1, CRPPA, GHR, PI4KA, FANCA, FANCD2,* *WBP11, MSTO1, SC5D, SMC5, ADAMTS2, KCNJ5, DGCR6* |
| Toe syndactyly | HP:0001770 | 8.75 x 10-3 | *FLI1, NSUN2,* *TMEM231,* *TRIO, SHH, LMBR1, DYNC2I1, FANCA, FANCD2, SC5D, KCNJ5* |
| Aplasia/hypoplasia affecting bones of the axial skeleton | HP:0009122 | 9.8 x 10-3 | *FLI1, NSUN2, AUTS2, TMEM231, ATAD3A, TRIO, HBA2, PIGW, RYR3, MNX1, NCAPG2, DYNC2I1, CTBP1, GHR, PI4KA, FANCA, FANCD2, MSTO1, SC5D, SMC5, ADAMTS2, KCNJ5* |
| Aplasia/Hypoplasia of the proximal phalanges of the hand | HP:0009851 | 9.83 x 10-3 | *TRIO, SHH, LMBR1, FANCD2* |
| Aplasia of the phalanges of the hand | HP:0009802 | 1.3 x 10-2 | *TRIO, SHH, LMBR1, FANCD2* |
| Aplasia involving bones of the upper limbs | HP:0009823 | 1.30 x 10-2 | *TRIO, SHH, LMBR1, FANCD2* |
| Neurodevelopmental abnormality | HP:0012759 | 1.49 x 10-2 | *HYDIN, FLI1, PRODH, NSUN2,* *PRKRA, AUTS2, NPHP1, TMEM231, RXYLT1, ATAD3A, TRIO, DNAH5, HBA2, DHTKD1, PIGW, ZNHIT3, RYR3, CLCNKA, DPP6, SHH, LMBR1, MNX1, UBE3C, NCAPG2, CTBP1, CRPPA, GHR, PI4KA, FANCA, FANCD2, WBP11, MSTO1, POLR2A, SC5D, SORL1, SMC5, ADAMTS2, KCNJ1, KCNJ5, DGCR6* |
| Micrognathia | HP:0000347 | 2.14 x 10-2 | *NSUN2, AUTS2, TMEM231, ATAD3A, TRIO, HBA2, PIGW, RYR3, NCAPG2, DYNC2I1, CTBP1, GHR, PI4KA, FANCA, FANCD2, MSTO1, SC5D, SMC5, ADAMTS2, KCNJ5* |
| Aplasia/Hypoplasia of the mandible | HP:0009118 | 2.22 x 10-2 | *NSUN2, AUTS2, TMEM231, ATAD3A, TRIO, HBA2, PIGW, RYR3, NCAPG2, DYNC2I1, CTBP1, GHR, PI4KA, FANCA, FANCD2, MSTO1, SC5D, SMC5, ADAMTS2, KCNJ5* |
| Aplasia/Hypoplasia involving bones of the skull | HP:0009116 | 2.61 x 10-2 | *NSUN2, AUTS2, TMEM231, ATAD3A, TRIO, HBA2, PIGW, RYR3, NCAPG2, DYNC2I1, CTBP1, GHR, PI4KA, FANCA,* *FANCD2, MSTO1, SC5D, SMC5, ADAMTS2, KCNJ5* |
| Hand polydactyly | HP:0001161 | 3.34 x 10-2 | *FLI1, NPHP1, TMEM231, SHH, LMBR1, DYNC2I1, CTBP1, FANCD2, SC5D* |
| Duplication of phalanx of hand | HP:0009997 | 3.79 x 10-2 | *FLI1, NPHP1, TMEM231, SHH, LMBR1, DYNC2I1, CTBP1, FANCA, FANCD2, SC5D* |
| Duplication of hand bones | HP:0004275 | 4.10 x 10-2 | *FLI1, NPHP1, TMEM231, SHH, LMBR1, DYNC2I1, CTBP1, FANCA, FANCD2, SC5D* |
| Duplication of bones involving the upper extremities | HP:0009142 | 4.10 x 10-2 | *FLI1, NPHP1, TMEM231, SHH, LMBR1, DYNC2I1, CTBP1, FANCA, FANCD2, SC5D* |
