# Supplementary material for: Consensus-based Detection of Aetiologic Copy Number Variants For Syndromic Orofacial Clefts Utilising Whole Exome Sequencing of Case Parent Trios
Source: Research Square preprint supplement (doi:10.21203/rs.3.rs-9225341/v1), 2026-04-01
Supplement: Supplementary file 7 [file ebca9950f53155ca7d95ccba.docx]

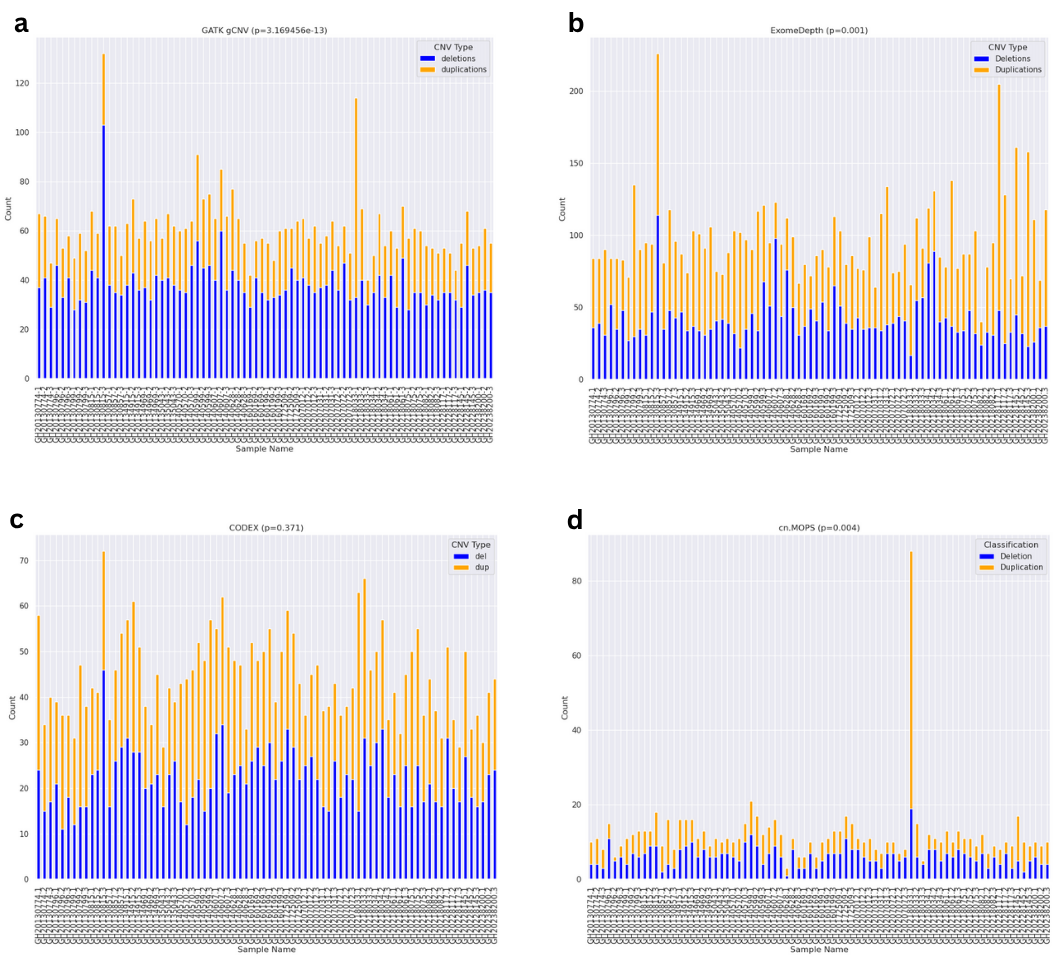


**Figure S2: Stacked barplots of deletions and duplications detected in each sample by the four tools: (a)** GATK gCNV, **(b)** ExomeDepth, **(c)** CODEX and **(d)** cn.MOPS. The p-value beside each tool’s name was calculated using a paired Wilcoxon signed-rank test, indicating bias towards detecting either deletions or duplications. The x-axis represents the sample IDs and the y axis represent the number of detected CNVs.
