# Supplementary figures and images for: Consensus-based Detection of Aetiologic Copy Number Variants For Syndromic Orofacial Clefts Utilising Whole Exome Sequencing of Case Parent Trios
Source: Research Square preprint supplement (doi:10.21203/rs.3.rs-9225341/v1), 2026-04-01

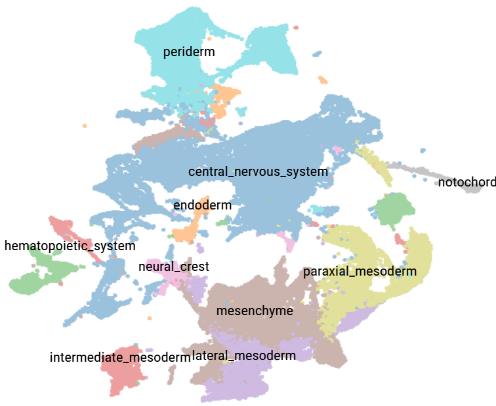

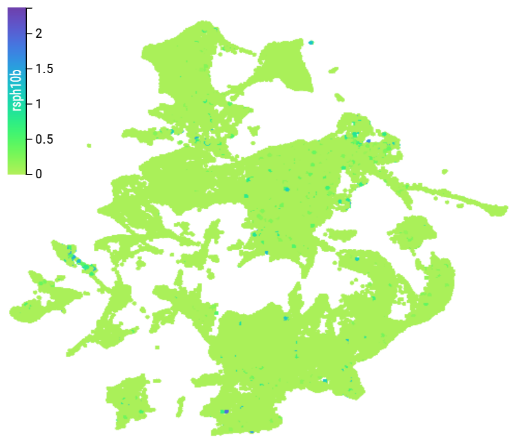

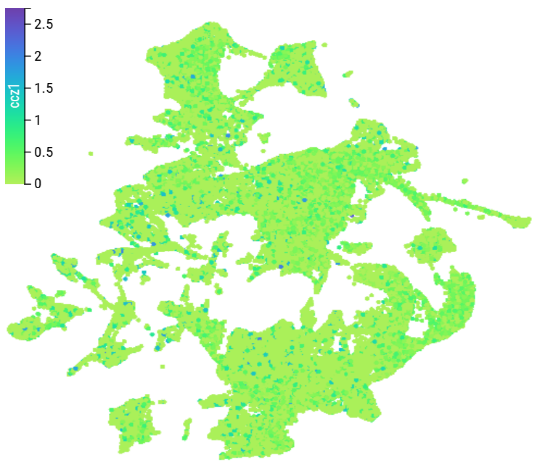

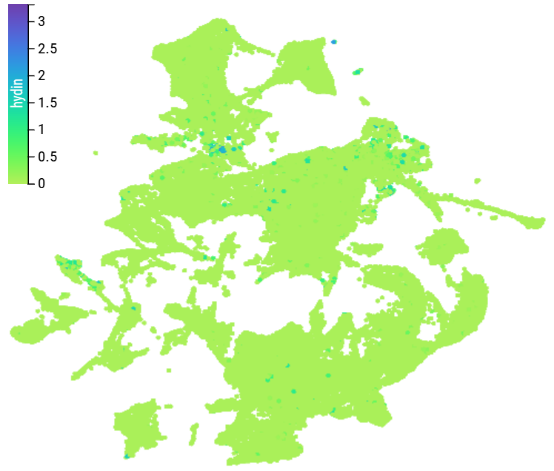

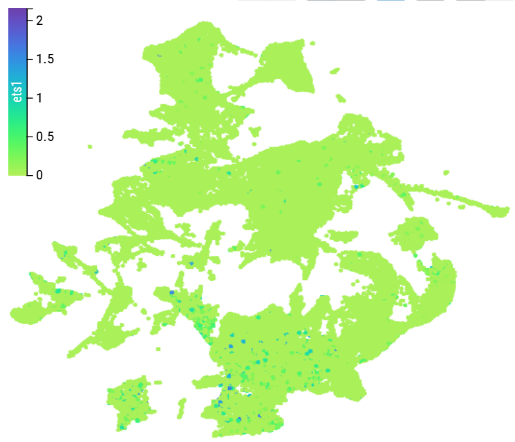

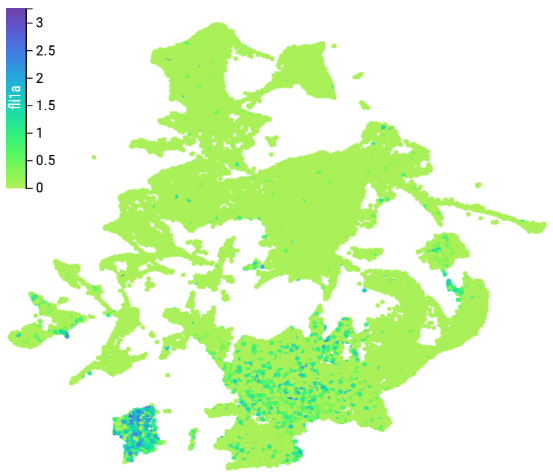

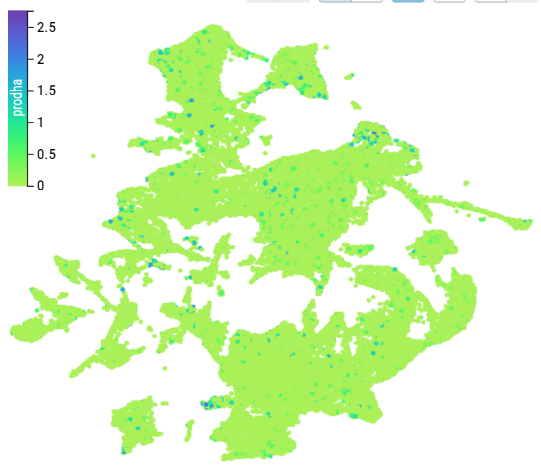


A

B

C

D

E

F

G

Supplement: Supplementary file 1 [file 1f7b6081e977bdf13c10cec2.docx]
